# Supplementary material
Source: publisher site journal article supplement (https://www.spandidos-publications.com/3324/downloadSupplementary)
Supplement: Supplementary file 1 [file downloadSupplementary]

Figure S1. Representative florescent images of xenograft tumors generated from Control (upper panel), HSP60-KD-1 (middle panel) and HSP60-KD-2 (lower panel) cells in nude mice on the 20th day after injection. HSP60, heat shock protein 60; KD, knockdown.

A

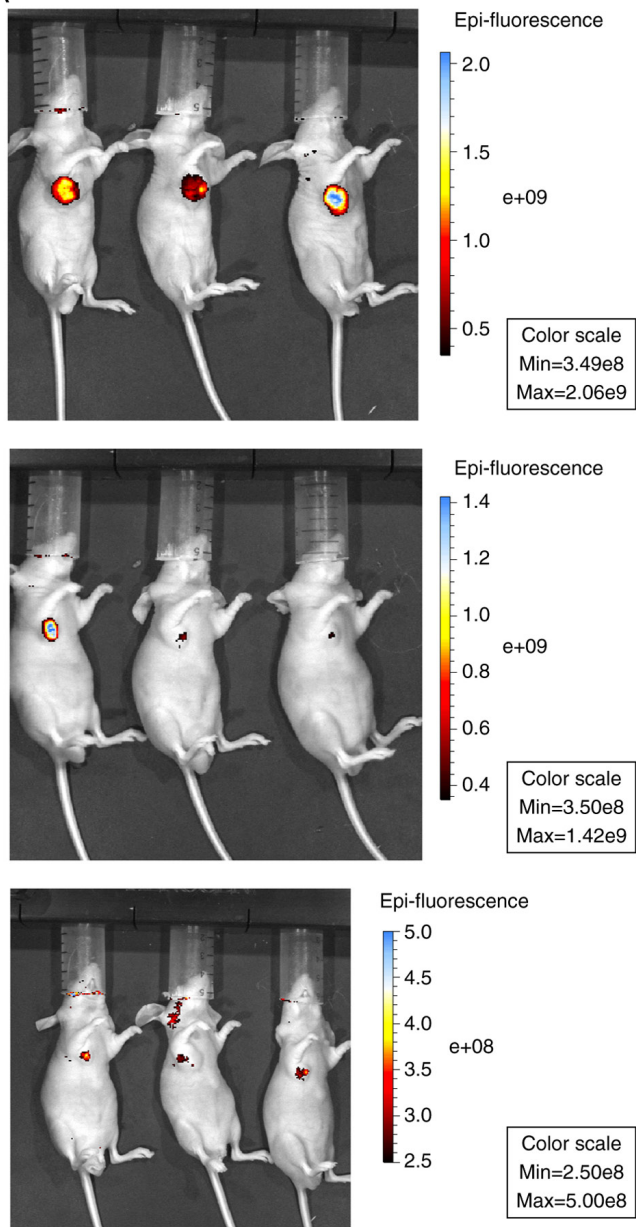

Table SI. Sequences of control shRNA and HSP60-directed shRNAs.

| Name                        | Sequence (5'-3')                                                 |
|-----------------------------|------------------------------------------------------------------|
| shRNA-HSP60-1               | TGCAGGGTTTGGTGACAATAGAATTCAAGAGATTCTATTGTCACCAAACCCTGTTTT<br>TTC |
| shRNA-HSP60-2               | TGCAGTGATTATTGAGCAGAGTTTTCAAGAGAAACTCTGCTCAATAATCACTGTTTT<br>TTC |
| shRNA-non-silencing control | TGTTCTCCGAACGTGTCACGTTTCAAGAGAACGTGACACGTTCCGGAGAATTTTTTC        |

The underlined text indicates the nucleotides for the specific shRNA sequence targeting the *HSP60* gene. shRNA, short hairpin RNA; HSP60, heat shock protein 60.
